# Supplementary material
Source: MDPI journal article supplement (https://www.mdpi.com/2673-9259/3/4/19)
Supplement: s1 [file s1]

**AMOB Registration Supplement**

Date: \_\_\_\_\_

**INSTRUCTIONS:** Fill in the answers that BEST describe you.*You may leave any question blank if you are not comfortable answering it.*

|                                                                                                                                                                                                                                                                                                                                                                                                                                                                                                                                                    |                            |
|----------------------------------------------------------------------------------------------------------------------------------------------------------------------------------------------------------------------------------------------------------------------------------------------------------------------------------------------------------------------------------------------------------------------------------------------------------------------------------------------------------------------------------------------------|----------------------------|
| <b>1. First Name:</b> _____                                                                                                                                                                                                                                                                                                                                                                                                                                                                                                                        | <b>2. Last Name:</b> _____ |
| <b>3. What is your address?</b><br><br><div style="display: flex; justify-content: space-between;"> <span>_____</span> <span>_____</span> </div> <div style="display: flex; justify-content: space-between;"> <span>Street Address</span> <span>City</span> </div> <div style="display: flex; justify-content: space-between; margin-top: 10px;"> <span>_____</span> <span>_____</span> <span>_____</span> </div> <div style="display: flex; justify-content: space-between;"> <span>County</span> <span>State</span> <span>Zip Code</span> </div> |                            |
| <b>4. What is your phone number? (____) _____-_____</b>                                                                                                                                                                                                                                                                                                                                                                                                                                                                                            |                            |
| <b>5. What is your email address?</b> _____                                                                                                                                                                                                                                                                                                                                                                                                                                                                                                        |                            |
| <b>6. What is your date of birth? (MM-DD-YYYY)</b> ____/____/____                                                                                                                                                                                                                                                                                                                                                                                                                                                                                  |                            |
| <b>7. What is your primary language?</b> <div style="display: flex; justify-content: space-around; margin-top: 5px;"> <span>English<br/><input type="radio"/></span> <span>Spanish<br/><input type="radio"/></span> <span>Other: _____<br/><input type="radio"/></span> </div>                                                                                                                                                                                                                                                                     |                            |
| <b>8. What is your insurance coverage?</b> <div style="display: flex; justify-content: space-around; margin-top: 5px;"> <span>Medicare<br/><input type="radio"/></span> <span>Medicaid<br/><input type="radio"/></span> <span>Private Insurance<br/><input type="radio"/></span> <span>Veterans Benefits<br/><input type="radio"/></span> <span>None<br/><input type="radio"/></span> <span>Other: _____<br/><input type="radio"/></span> </div>                                                                                                   |                            |
| <b>9. Do you have a Medicare Advantage Plan?</b> <div style="display: flex; justify-content: space-around; margin-top: 5px;"> <span>Yes<br/><input type="radio"/></span> <span>No<br/><input type="radio"/></span> </div> <p style="margin-top: 5px;">If yes, with who? _____</p>                                                                                                                                                                                                                                                                  |                            |
| <b>10. How many people are in your household, including yourself?</b> _____                                                                                                                                                                                                                                                                                                                                                                                                                                                                        |                            |
| <b>11. Please indicate your monthly income. If you are married, please indicate the income that best represents your combined monthly income. \$</b> _____                                                                                                                                                                                                                                                                                                                                                                                         |                            |

**12. Would you like to be contacted about future health care education classes and event?**

Yes

No

☐☐**13. Emergency Contact Information:**

|       |              |              |
|-------|--------------|--------------|
| _____ | _____        | _____        |
| Name  | Phone Number | Relationship |

**14. Do you have a primary care doctor or health care provider?**

Yes

No

☐☐**15. If yes, please provide health care provider information**

|       |              |
|-------|--------------|
| _____ | _____        |
| Name  | Phone Number |

**16. Can we contact you by text?**

Yes

No

☐☐

I authorize the collaborators of this workshop to use this data for analysis to identify the benefits of this workshop for individuals with chronic diseases and their caregivers.

Your information will remain confidential:

\_\_\_\_\_  
(Signature)

**AMOB Pre-Survey Supplement**

First &amp; Last Name: \_\_\_\_\_ Today's Date: \_\_\_\_\_

**General Health**

1. Thinking about your *physical health*, which includes physical illness and injury, for *how many days* during the past 30 days was your *physical health* NOT good?

- ☐ Number of Days: \_\_\_\_\_
- ☐ None

2. Thinking about your *mental health*, which includes stress, depression, and problems with emotions, for *how many days* during the past 30 days was your *mental health* NOT good?

- ☐ Number of Days: \_\_\_\_\_
- ☐ None

3. During the past 30 days, for about *how many days* did *poor physical or mental health* keep you from doing your usual activities, such as self-care, work, or recreation?

- ☐ Number of Days: \_\_\_\_\_
- ☐ None

**Physical Activity**

4. Mark only one box to tell us how much you are walking or exercising now:

- ☐ I do not exercise or walk regularly now, and I do not intend to start
- ☐ I do not exercise or walk regularly, but I have been thinking of starting
- ☐ I am trying to start to exercise or walk.
- ☐ I have exercised or walked infrequently for over a month
- ☐ I am doing moderate exercise less than 3 times per week
- ☐ I have been doing moderate exercise 3 or more times per week

**The next few questions ask about falls. By a fall, we mean when a person unintentionally comes to rest on the ground or another lower level.**

| Fall History                                                                                                                                                                      |          |         |
|-----------------------------------------------------------------------------------------------------------------------------------------------------------------------------------|----------|---------|
| 5. In the past 3 months, how many TIMES did you go to a hospital or emergency department due to a fall or fall-related injury?                                                    | _____    | Times   |
| 6. In the past 3 months, how many TIMES were you hospitalized for one night or longer due to a fall or fall-related injury?                                                       | _____    | Times   |
| 7. In the past 3 months, how many NIGHTS did you spend in the hospital due to a fall or fall-related injury?                                                                      | _____    | Nights  |
| 8. During the last 30 days, were you hospitalized overnight due to a fall?                                                                                                        | Yes<br>○ | No<br>○ |
| 9. How many different times did you stay in any hospital overnight or longer during the past 30 days due to a fall?                                                               | _____    | Times   |
| 10. How many nights were you in the hospital during the past 30 days due to a fall?                                                                                               | _____    | Nights  |
| 11. During the past 30 days, did you see a doctor or other healthcare professional at an emergency room due to a fall?<br>(Do not include times you stayed in hospital overnight) | Yes<br>○ | No<br>○ |

I authorize the collaborators of this workshop to use this data for analysis to identify the benefits of this workshop for individuals with chronic diseases and their caregivers.

Your information will remain confidential:

\_\_\_\_\_  
(Signature)

# [Program Name] Participant Information Form

OMB Control No. 0985-0039

Exp. Date 03/31/2021

Today's date: \_\_\_\_/\_\_\_\_/\_\_\_\_  
M M D D Y Y Y Y

Participant I.D. \_\_\_\_/\_\_\_\_/\_\_\_\_ (first two letters of your first name, first two letters of your last name, last two numbers of your birth year)

1. Did your doctor, nurse, physical therapist or other health care provider suggest that you take this program?

☐ Yes ☐ No

2. How old are you today? \_\_\_\_\_years

3. Do you live alone? ☐ Yes ☐ No

4. Are you: ☐ Male or ☐ Female?

5. Are you of Hispanic, Latino, or Spanish origin? ☐ Yes ☐ No

6. What is your race? **Check all that apply.**

☐ American Indian or Alaska Native

☐ Black or African American

☐ Asian

☐ Native Hawaiian or other Pacific Islander

☐ White

7. What is the highest grade or level of school that you have completed?

☐ Less than high school

☐ High school graduate or GED

☐ Some high school

☐ Some college or vocational school

☐ College graduate or higher

8. Has a health care provider ever told you that you have any of the following chronic conditions (i.e., one that has lasted for three months or more)? **Check Yes or No.**

|                                            |                                                    |                                       |                                                    |
|--------------------------------------------|----------------------------------------------------|---------------------------------------|----------------------------------------------------|
| Arthritis or other bone/joint disease      | <input type="radio"/> Yes <input type="radio"/> No | High blood pressure/hypertension      | <input type="radio"/> Yes <input type="radio"/> No |
| Breathing/lung disease                     | <input type="radio"/> Yes <input type="radio"/> No | Glaucoma/other chronic eye problem    | <input type="radio"/> Yes <input type="radio"/> No |
| Cancer                                     | <input type="radio"/> Yes <input type="radio"/> No | Osteoporosis                          | <input type="radio"/> Yes <input type="radio"/> No |
| Depression                                 | <input type="radio"/> Yes <input type="radio"/> No | Parkinson's Disease                   | <input type="radio"/> Yes <input type="radio"/> No |
| Diabetes                                   | <input type="radio"/> Yes <input type="radio"/> No | Other Chronic Condition(s) (specify): | <hr/> <hr/> <hr/>                                  |
| Heart disease or blood circulation problem | <input type="radio"/> Yes <input type="radio"/> No |                                       |                                                    |

9. Are you limited in any way in any activities because of physical, mental, or emotional problems? ☐ Yes ☐ No

**Please turn this paper over and fill out the other side.**

10. In general, would you say that your health is:

- ☐ Excellent      ☐ Very good      ☐ Good      ☐ Fair      ☐ Poor

**The next few questions ask about falls. By a fall, we mean when a person unintentionally comes to rest on the ground or another lower level.**

11. In the past 3 months, how many times have you fallen? ☐ none    ☐ \_\_\_\_\_ times

**If you fell in the past 3 months:**

a. how many of these falls caused an injury? (By an injury we mean the fall caused you to limit your regular activities for at least a day or to go see a doctor.)

\_\_\_\_\_ number of falls causing an injury

b. where did the fall(s) occur (Please check all that apply)?

- ☐ Indoors    ☐ Outdoors    ☐ Both indoors and outdoors

c. what happened after you fell and had an injury? (Please check all that apply)

- ☐ Went to the Emergency Room      ☐ Was admitted to the hospital

- ☐ Visited my Primary Care Physician      ☐ Did not seek medical care \_\_\_\_\_

12. How fearful are you of falling?

- ☐ Not at all      ☐ A little      ☐ Somewhat      ☐ A lot

13. Please mark the circle that tells us how sure you are that you can do the following activities.

**How sure are you that:**

|                                         | Very Sure             | Sure                  | Somewhat sure         | Not at all sure       |
|-----------------------------------------|-----------------------|-----------------------|-----------------------|-----------------------|
| a. I can find a way to get up if I fall | <input type="radio"/> | <input type="radio"/> | <input type="radio"/> | <input type="radio"/> |
| b. I can find a way to reduce falls     | <input type="radio"/> | <input type="radio"/> | <input type="radio"/> | <input type="radio"/> |
| c. I can protect myself if I fall       | <input type="radio"/> | <input type="radio"/> | <input type="radio"/> | <input type="radio"/> |
| d. I can increase my physical strength  | <input type="radio"/> | <input type="radio"/> | <input type="radio"/> | <input type="radio"/> |
| e. I can become more steady on my feet  | <input type="radio"/> | <input type="radio"/> | <input type="radio"/> | <input type="radio"/> |

14. During the last 4 weeks, to what extent has your concern about falling interfered with your normal social activities with family, friends, neighbors or groups?

- ☐ Extremely      ☐ Quite a bit      ☐ Moderately      ☐ Slightly      ☐ Not at all

15. I have made safety modifications in my home, such as installing grab bars or securing loose rugs, to reduce my risk of falling \_\_\_ True \_\_\_ False

16. What best describes your activity level?

- ☐ Vigorously active for at least 30 min, 3 times per week  
☐ Moderately active at least 3 times per week  
☐ Seldom active, preferring sedentary activities

**PAPERWORK REDUCTION ACT STATEMENT**

According to the Paperwork Reduction Act of 1995, no persons are required to respond to a collection of information unless it displays a valid OMB control number. The valid OMB control number for this information collection is 0985-0039. The time required to complete this information collection is estimated to average 6 minutes per response. If you have comments concerning the accuracy of the time estimate(s) or suggestions for improving this form, please write to: Administration for Community Living, 330 C St SW, Washington, DC 20201, Attention: PRA Reports Clearance Officer.
